# Supplementary material
Source: publisher figshare collection journal article supplement (https://acs.figshare.com/ndownloader/files/7779283)
Supplement: Supplementary file 1 [file 7779283]

Compound,Smiles,"EGFRWT 
IC50 [nM]",EGFRL858R IC50 [nM],EGFRL858R/T790M IC50 [nM],A431        EC50 [nM],HCC827        EC50 [nM],H1975        EC50 [nM],A549        EC50 [nM],H358        EC50 [nM],EGFRWT Ki [nM],EGFRWT kinact [min-1],EGFRWT kinact/Ki [µM-1s-1],EGFRL858R Ki [nM],EGFRL858R  kinact [min-1],EGFRL858R  kinact/Ki [µM-1s-1],EGFRL858R/T790M Ki [nM],EGFRL858R/T790M kinact [min-1],EGFRL858R/T790M kinact/Ki [µM-1s-1],EGFRL858R/T790M/C797S IC50 [nM],"Microsomal Stability Phase I
CLint human [µL min-1 mg-1]","Microsomal Stability Phase I
CLint mouse [µL min-1 mg-1]","Plasma Stability human
[% remaining]","Plasma Stability mouse
[% remaining]"
30a,CN(CCN(C)C)C(C(NC(C=C)=O)=C1)=CC=C1NC2=NNC3=C2C=CC=C3,>10000,>10000,2626 ± 113,5971 ± 2319,9813 ± 1566,6926 ± 2370,7976 ± 1128,11448 ± 5747,,,,,,,,,,,,,,
30b,CN(CCN(C)C)C(C(NC(CC)=O)=C1)=CC=C1NC2=NNC3=C2C=CC=C3,>10000,8470 ± 883,9726 ± 158,>30000,>30000,>30000,>30000,>30000,,,,,,,,,,,,,,
31a,COC(C=C(N(C)CCN(C)C)C(NC(C=C)=O)=C1)=C1NC2=NNC3=C2C=CC=C3,9272 ± 456,3352 ± 645,462 ± 60,10412 ± 4177,4650 ± 756,3527 ± 1690,23637 ± 5576,20032 ± 2222,,,,,,,,,,,,,,
31b,COC(C=C(N(C)CCN(C)C)C(NC(CC)=O)=C1)=C1NC2=NNC3=C2C=CC=C3,>10000,>10000,>10000,>30000,>30000,>30000,>30000,>30000,,,,,,,,,,,,,,
6a,COC(C=C(N(C)CCN(C)C)C(NC(C=C)=O)=C1)=C1NC2=NNC3=C2C=CC(C4=CC=C(C=CC=C5)C5=C4)=C3,312 ± 104,25 ± 2,85 ± 2,1652 ± 258,2348 ± 594,1610 ± 226,2875 ± 1083,3038 ± 671,,,,,,,,,,,,,,
6b,COC(C=C(N(C)CCN(C)C)C(NC(C=C)=O)=C1)=C1NC2=NNC3=C2C=CC(C4=CC=CC5=C4C=CC=C5)=C3,1.4 ± 0.2,<1,4.3 ± 2.5,3175 ± 574,121 ± 40,1102 ± 181,2261 ± 497,4315 ± 739,,,,,,,,,,,,,,
6c,COC(C=C(N(C)CCN(C)C)C(NC(C=C)=O)=C1)=C1NC2=NNC3=C2C=CC(C4=CN=CC5=C4C=CC=C5)=C3,2.8 ± 0.3,1.1 ± 0.1,6.0 ± 3.8,2822 ± 1273,162 ± 86,632 ± 323,659 ± 193,4740 ± 1902,,,,,,,,,,,,,,
6d,COC(C=C(N(C)CCN(C)C)C(NC(C=C)=O)=C1)=C1NC2=NNC3=C2C=CC(C4=CN(C)C5=C4C=CC=C5)=C3,9.3 ± 1.2,1.5 ± 0.4,4.8 ± 2.0,2206 ± 403,400 ± 138,417 ± 159,2163 ± 412,2575 ± 545,236 ± 89,0.28 ± 0.02,0.02 ± 0.00,57 ± 18,0.14 ± 0.02,0.04 ± 0.02,149 ± 45,0.37 ± 0.09,0.04 ± 0.03,>10000,1.2,28.2,75.8,95.9
6e,COC(C=C(N(C)CCN(C)C)C(NC(C=C)=O)=C1)=C1NC2=NNC3=C2C=CC(C4=CN=CC=C4)=C3,97 ± 10,29 ± 1,15 ± 0,5671 ± 1124,730 ± 88,1041 ± 384,6877 ± 2663,8712 ± 1037,,,,,,,,,,,,,,
6f,COC(C=C(N(C)CCN(C)C)C(NC(C=C)=O)=C1)=C1NC2=NNC3=C2C=CC(C4=CC=NC=C4)=C3,30 ± 2,14 ± 3,5.0 ± 0.5,3943 ± 281,106 ± 19,489 ± 150,5560 ± 1516,5842 ± 1368,,,,,,,,,,>10000,3.6,<1,85.7,91.7
6g,COC(C=C(N(C)CCN(C)C)C(NC(C=C)=O)=C1)=C1NC2=NNC3=C2C=CC(C4=CC(N(C)C)=CC=C4)=C3,48 ± 4,10 ± 1,22 ± 3,3472 ± 365,734 ± 212,1321 ± 115,3564 ± 1769,5292 ± 748,,,,,,,,,,,,,,
6h,COC(C=C(N(C)CCN(C)C)C(NC(C=C)=O)=C1)=C1NC2=NNC3=C2C=CC(C4=CC=C(N(C)C)C=C4)=C3,387 ± 21,80 ± 4,72 ± 3,1411 ± 45,2522 ± 464,1050 ± 346,1387 ± 176,1637 ± 325,,,,,,,,,,,,,,
6i,COC(C=C(N(C)CCN(C)C)C(NC(C=C)=O)=C1)=C1NC2=NNC3=C2C=CC(C4=CC=C(F)C=C4)=C3,5.0 ± 0.4,1.6 ± 0.1,5.0 ± 0.8,2277 ± 749,97 ± 18,608 ± 180,3017 ± 1143,3481 ± 796,,,,,,,,,,,,,,
6j,COC(C=C(N(C)CCN(C)C)C(NC(C=C)=O)=C1)=C1NC2=NNC3=C2C=CC(C4=CC(F)=CC=C4)=C3,26 ± 4,8.5 ± 3.3,10 ± 1,2165 ± 428,765 ± 154,659 ± 288,2863 ± 568,3743 ± 336,,,,,,,,,,,,,,
6k,COC(C=C(N(C)CCN(C)C)C(NC(C=C)=O)=C1)=C1NC2=NNC3=C2C=CC(C4=CC(C(F)(F)F)=CC=C4)=C3,16 ± 4,4.5 ± 0.3,38 ± 11,3539 ± 496,856 ± 89,1856 ± 432,3702 ± 862,4696 ± 1312,,,,,,,,,,,,,,
6l,COC(C=C(N(C)CCN(C)C)C(NC(C=C)=O)=C1)=C1NC2=NNC3=C2C=CC(NC4=CC(F)=CC=C4)=C3,<1,<1,<1,3103 ± 1287,22 ± 8,191 ± 105,1637 ± 957,2650 ± 1066,5.1 ± 1.4,0.14 ± 0.08,0.47 ± 0.12,3.9 ± 1.0,0.09 ± 0.05,0.40 ± 0.25,7.4 ± 3.6,0.17 ± 0.12,0.39 ± 0.16,>10000,3.4,21.6,77.8,97.9
7a,COC(C=C(N(C)CCN(C)C)C(NC(C=C)=O)=C1)=C1NC2=NNC3=C2C=C(C4=CC=C(C=CC=C5)C5=C4)C=C3,8.1 ± 2.1,2.2 ± 0.3,1.1 ± 0.2,1765 ± 305,1095 ± 56,960 ± 238,2869 ± 934,3146 ± 720,147 ± 42,0.18 ± 0.09,0.02 ± 0.00,105 ± 29,0.14 ± 0.07,0.02 ± 0.02,28 ± 4,0.50 ± 0.03,0.30 ± 0.13,>10000,<1,<1,91.7,95.9
7b,COC(C=C(N(C)CCN(C)C)C(NC(C=C)=O)=C1)=C1NC2=NNC3=C2C=C(C4=CC=CC5=C4C=CC=C5)C=C3,33 ± 6,12 ± 1,2.7 ± 0.9,2780 ± 256,1846 ± 394,2077 ± 451,3435 ± 427,4992 ± 555,,,,,,,,,,,,,,
7c,COC(C=C(N(C)CCN(C)C)C(NC(C=C)=O)=C1)=C1NC2=NNC3=C2C=C(C4=CC=C(F)C=C4)C=C3,6.8 ± 0.2,2.0 ± 0.7,<1,2070 ± 668,459 ± 110,694 ± 68,3033 ± 927,3387 ± 910,,,,,,,,,,>10000,<1,3.9,82.3,90
1,COC1=C(OCCCN2CCOCC2)C=C3C(N=CN=C3NC4=CC(Cl)=C(F)C=C4)=C1,<1,<1,188 ± 96,2162 ± 1394,<14,10733 ± 2550,8499 ± 1788,13512 ± 4380,,,,,,,,,,,39.5,157.5,90.3,91.5
2,FC(C=C1)=C(Cl)C=C1NC2=NC=NC3=CC(O[C@H]4CCOC4)=C(NC(/C=C/CN(C)C)=O)C=C32,,,,,,,,,,,,,,,,,,,,,,
3,COC(C=C(N1CCN(C(C)=O)CC1)C=C2)=C2NC3=NC=C(C(F)(F)F)C(NC4=CC=CC(NC(C=C)=O)=C4)=N3,1.7 ± 0.5,1.6 ± 0.2,2.6 ± 0.6,1655 ± 120,45 ± 9,118 ± 47,,,74 ± 7,0.18 ± 0.01,0.04 ± 0.01,1.8 ± 0.2,0.18 ± 0.05,1.67 ± 0.32,1.7 ± 0.1,0.29 ± 0.05,2.95 ± 0.66,69 ± 13,5.1,51.2,>99,>99
4,CN(C)CCN(C)C(C(NC(C=C)=O)=C1)=CC(OC)=C1NC2=NC=CC(C3=CN(C)C4=C3C=CC=C4)=N2,1.6 ± 0.2,1.3 ± 0.5,<1,667 ± 232,<14,19 ± 9,1827 ± 183,2835 ± 256,14 ± 2,0.43 ± 0.11,0.52 ± 0.05,1.6 ± 0.3,0.30 ± 0.01,3.24 ± 0.46,1.5 ± 0.1,0.33 ± 0.06,3.75 ± 0.39,77 ± 22,4.1,81.1,77.8,75.2
